# Supplementary material
Source: PubMed Central journal article supplement (PMC7647957)
Supplement: NIHMS1589608-supplement-1.pdf [file NIHMS1589608-supplement-1.pdf]

Supplemental Table 1. Risk factors for correcting one's unreported marijuana use among those surveyed entering nightclubs

|                      | aPR     | (95% CI)      |
|----------------------|---------|---------------|
| Age (Trichotomy)     |         |               |
| 18-24 years          | 1.00    |               |
| 25-29 years          | 0.93    | (0.51, 1.69)  |
| ≥30 years            | 2.87**  | (1.34, 6.18)  |
| Sex                  |         |               |
| Male                 | 1.00    |               |
| Female               | 0.68    | (0.33, 1.40)  |
| Race/Ethnicity       |         |               |
| White                | 1.00    |               |
| Black                | 0.63    | (0.30, 1.33)  |
| Hispanic             | 1.77    | (0.91, 3.47)  |
| Other/Mixed          | 1.41    | (0.52, 3.83)  |
| Education            |         |               |
| College Degree       | 1.00    |               |
| High School or Less  | 1.12    | (0.54, 2.31)  |
| Some College         | 0.77    | (0.29, 2.08)  |
| Graduate School      | 0.37    | (0.13, 1.06)  |
| Sexual Orientation   |         |               |
| Heterosexual         | 1.00    |               |
| Gay/Lesbian          | 2.04    | (0.68, 6.11)  |
| Bisexual             | 0.07**  | (0.01, 0.36)  |
| Lifetime Drug Use    |         |               |
| Ecstasy              |         |               |
| No                   | 1.00    |               |
| Yes                  | 0.19**  | (0.07, 0.52)  |
| Powder Cocaine       |         |               |
| No                   | 1.00    |               |
| Yes                  | 0.65    | (0.25, 1.66)  |
| LSD                  |         |               |
| No                   | 1.00    |               |
| Yes                  | 0.34    | (0.11, 1.09)  |
| Ketamine             |         |               |
| No                   | 1.00    |               |
| Yes                  | 0.18*   | (0.04, 0.87)  |
| Methamphetamine      |         |               |
| No                   | 1.00    |               |
| Yes                  | 1.55    | (0.29, 8.21)  |
| Honesty to Responses |         |               |
| All                  | 1.00    |               |
| Most                 | 9.24*** | (5.03, 16.98) |
| Some or Hardly Any   | 1.61    | (0.29, 9.00)  |

|      |        |              |
|------|--------|--------------|
| None | 3.52** | (1.42, 8.75) |
|------|--------|--------------|

*Note.* This sensitivity analysis was limited to those surveyed entering nightclubs (n=702). The outcome variable indicates the individuals (12.8%) who originally did not report marijuana use and then later corrected their response to indicate use. aPR = adjusted prevalence ratio; CI = confidence interval.

\*p < .05, \*\*p < .01, \*\*\*p < .001

Supplemental Table 2. Comparisons of demographic and drug use characteristics according to whether participants self-reported honest answering of responses

|                     | Answered All or Most<br>Honestly<br>Weighted % | Answered Fewer than All or<br>Most Honestly<br>Weighted % |
|---------------------|------------------------------------------------|-----------------------------------------------------------|
| Age (Trichotomy)    |                                                |                                                           |
| 18-24 years         | 90.9                                           | 9.1                                                       |
| 25-29 years         | 95.6                                           | 4.4                                                       |
| ≥30 years           | 93.6                                           | 6.4                                                       |
| Sex                 |                                                |                                                           |
| Male                | 92.8                                           | 7.3                                                       |
| Female              | 94.7                                           | 5.3                                                       |
| Race/Ethnicity      |                                                |                                                           |
| White               | 93.1                                           | 6.9                                                       |
| Black               | 91.8                                           | 8.2                                                       |
| Hispanic            | 93.8                                           | 6.2                                                       |
| Other/Mixed         | 94.5                                           | 5.5                                                       |
| Education           |                                                |                                                           |
| College Degree      | 93.9                                           | 6.1                                                       |
| High School or Less | 88.6                                           | 11.4                                                      |
| Some College        | 95.0                                           | 5.0                                                       |
| Graduate School     | 93.7                                           | 6.3                                                       |
| Sexual Orientation  |                                                |                                                           |
| Heterosexual        | 93.0                                           | 7.0                                                       |
| Gay/Lesbian         | 94.3                                           | 5.7                                                       |
| Bisexual            | 96.4                                           | 3.6                                                       |
| Lifetime Drug Use   |                                                |                                                           |
| Ecstasy             |                                                |                                                           |
| No                  | 90.7                                           | 9.3*                                                      |
| Yes                 | 96.3                                           | 3.7                                                       |
| Powder Cocaine      |                                                |                                                           |
| No                  | 91.8                                           | 8.2                                                       |
| Yes                 | 95.6                                           | 4.4                                                       |
| LSD                 |                                                |                                                           |
| No                  | 93.7                                           | 6.3                                                       |
| Yes                 | 92.6                                           | 7.4                                                       |
| Ketamine            |                                                |                                                           |
| No                  | 93.2                                           | 6.8                                                       |
| Yes                 | 94.2                                           | 5.8                                                       |
| Methamphetamine     |                                                |                                                           |
| No                  | 94.1                                           | 5.9                                                       |
| Yes                 | 87.0                                           | 13.0                                                      |

Note. 93.4% reported that they answered all or most questions honestly and 6.6% reported not answered all or most questions honestly. \*p<.05
